# Supplementary material for: A polyamine acetyltransferase regulates the motility and biofilm formation of Acinetobacter baumannii
Source: PubMed Central journal article supplement (PMC10267138; doi:10.1038/s41467-023-39316-5), 2023-06-14
Supplement: 41467_2023_39316_MOESM1_ESM.pdf [file 41467_2023_39316_MOESM1_ESM.pdf]

## Supplementary Information

### A polyamine acetyltransferase regulates the motility and biofilm formation of *Acinetobacter baumannii*

Julija Armalytė, Albinas Čepauskas, Gabija Šakalytė, Julius Martinkus, Jūratė Skerniškytė, Chloé Martens, Edita Sužiedėlienė, Abel Garcia-Pino, Dukas Jurėnas

#### Supplementary Figures and Captions

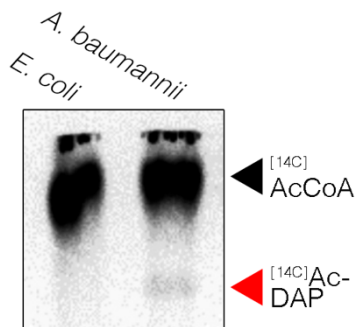

**Supplementary Fig. S1 | Detection of substrates of Dpa enzyme in cellular extracts.** (a) The natural substrate of the Dpa enzyme is present in *A. baumannii* cellular extract, but not in *E. coli*. The cellular extracts were prepared from late exponential phase bacteria as described in the methods section.

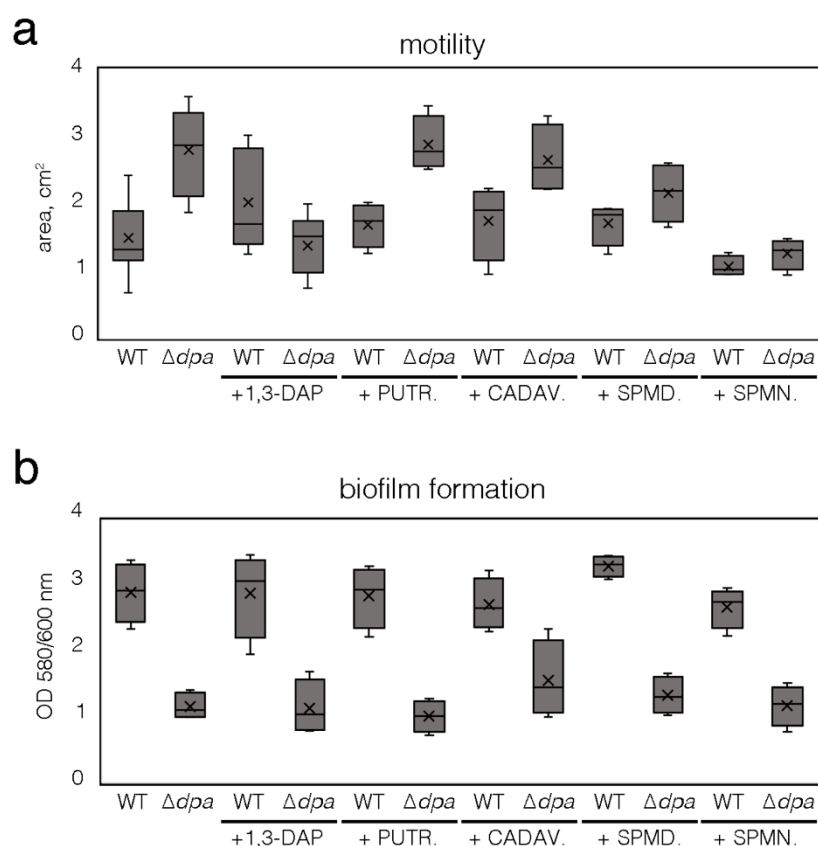

**Supplementary Fig. S2 | Effect of polyamines on motility and biofilm formation.** (a) The twitching motility of *A. baumannii*. Bacterial growth zone (in cm<sup>2</sup>) around the inoculation site of bacteria were grown with or without 0.1 mM of different polyamines added to the media. The first four bar graphs correspond to the same data presented in Figure 1 b and are shown here for the reference. Experiments were executed at the same time for all the conditions shown. (b) Biofilm formation of *A. baumannii* and its *dpa* mutant in presence of different polyamines. Biofilms were allowed to grow for 18 h at 37 ° C, planktonic cells were removed and biofilms were quantified by crystal violet staining. Values were normalized to the optical density of the planktonic bacteria recovered from the well. Top and bottom of the box plot whiskers show maximum and minimum values, top and bottom of the box - 75th percentile and 25th percentile and line through the box with x markers show the median and the mean of the sample respectively. Each condition has been tested four times in biologically independent experiments, first four conditions of motility have been tested nine times. Source data is provided at the end of the Supplementary information file.

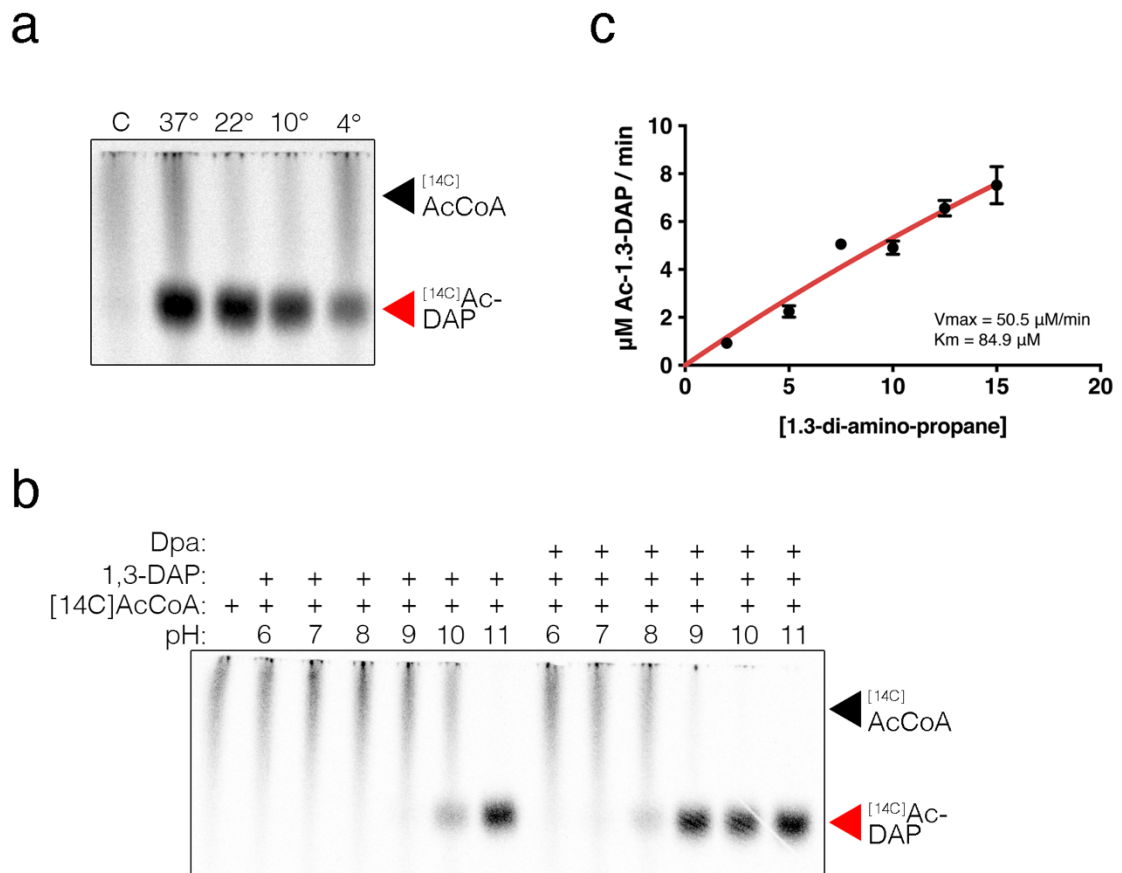

**Supplementary Fig. S3 | Dpa kinetics.** (a) Temperature dependent and (b) pH dependent acetylation of 1,3-DAP by Dpa, as compared to the spontaneous acetylation. (c) kinetics of 1,3-DAP acetylation by Dpa;  $V_{max}$  and  $K_m$  are indicated. Each reaction was performed three times over independent experiments. Source data is provided at the end of the Supplementary information file.

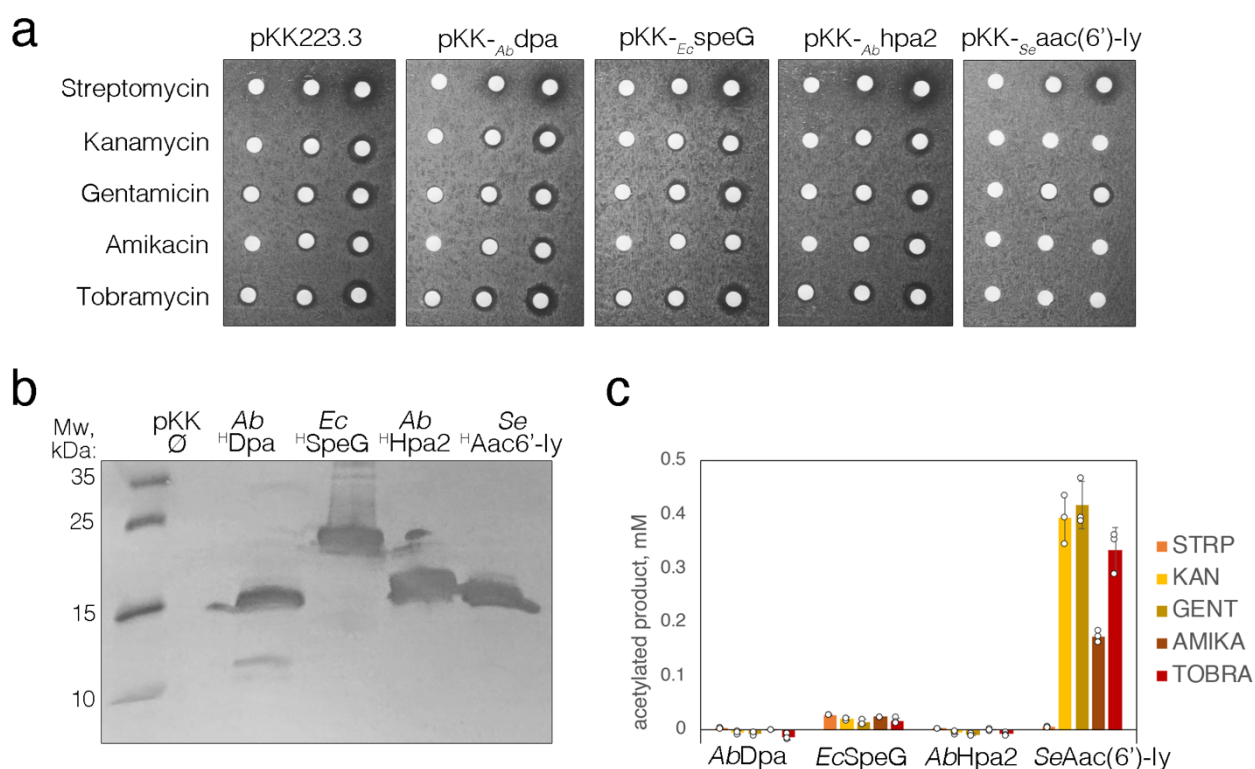

**Supplementary Fig. S4 | Aminoglycoside antibiotic resistance and acetylation.** (a) *E. coli* cells transformed with pKK223.3 vectors carrying difference GNAT acetyltransferases (*A. baumannii* Dpa, *E. coli* SpeG, *A. baumannii* Hpa2 or *S. enterica* Aac(6')-I 5y) were grown to mid-exponential phase, acetyltransferase production was induced with 0.5 mM IPTG for 2 hours and pre-induced bacteria were spread on solid LB agar containing 0.5 mM IPTG. Whatman discs soaked in series of 2-fold dilution of antibiotics (final concentrations of 256, 128 and 64 µg/mL of Streptomycin; 128, 64 and 32 µg/mL of Kanamycin; 64, 32 and 16 µg/mL of Gentamicin, Amikacin or Tobramycin) were then deposited on the bacterial loans. Plates were incubated overnight at 37 °C and zones of inhibition were visualized. (b) Expression of acetyltransferases was controlled by western-blot against his-tag. Experiments were performed four times independently; representative pictures and western blot are shown. (c) *In vitro* acetylation of 5 mM of antibiotics in presence of 0.5 mM acCoA, with 2 µM of enzyme at 30 °C for 30 min. Acetylation was quantified with DTNB reagent as described in the methods section. Each reaction was performed three times over independent experiments. Source data are provided at the end of the Supplementary information file.

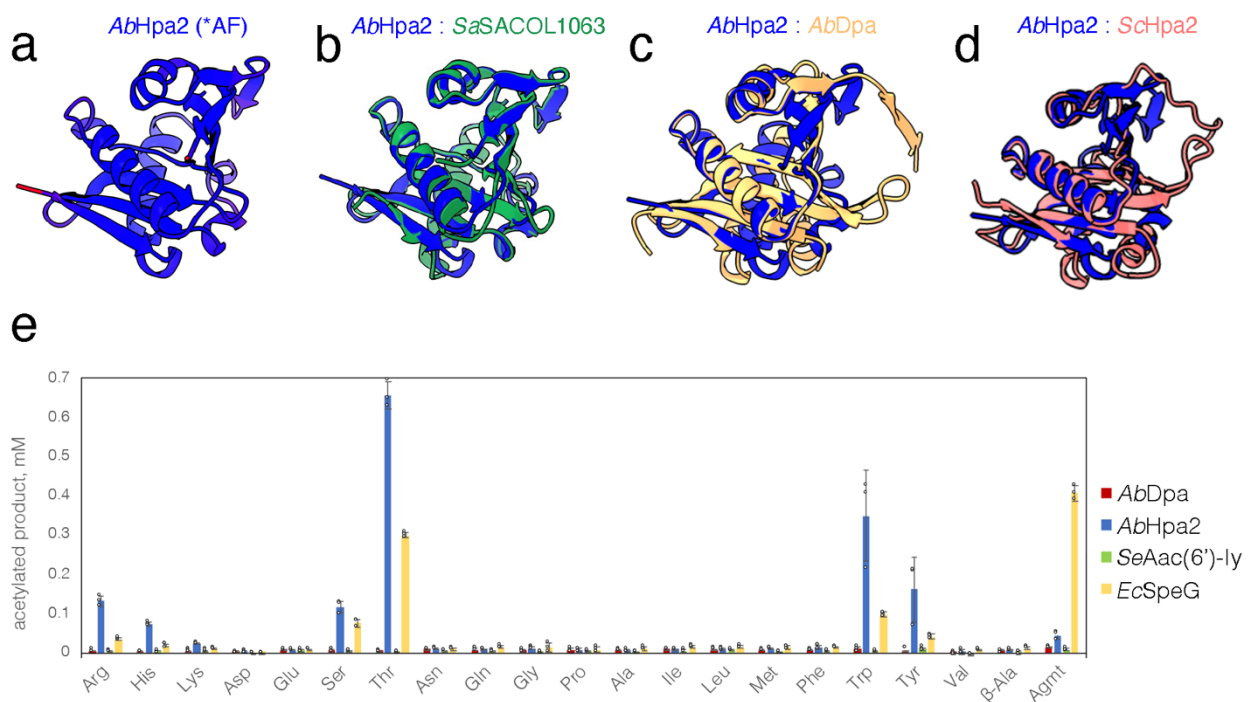

**Supplementary Fig. S5 | *A. baumannii* Hpa2 is homologous to *S. aureus* SACOL1063 and acetylates a subset of amino acids.** (a) AlphaFold2 model of *A. baumannii* Hpa2 colored by confidence from blue (100% confident) to red (not confident). TM-score (pTM = 0.9) was obtained for the best-ranked model shown here. (b) Structure alignment with closest structural homologue *S. aureus* SACOL1063 (PDB: [5JPH](#)), based on DALI sever (Z score 24.0, rmsd 1.2). Alignment was executed with Chimera; *R.m.s.d.* between 115 pruned atom pairs is 0.734 Å; across all 137 pairs – 2.495 Å. (c) Structure alignment of *A. baumannii* Hpa2 model and Dpa; *R.m.s.d.* between 52 pruned atom pairs is 0.752 Å; across all 130 pairs - 8.271 Å. (d). Alignment of *AbHpa2* with yeast Hpa2; *R.m.s.d.* between 48 pruned atom pairs is 0.928 Å and across all 127 pairs is 7.111 Å. (e) *In vitro* acetylation of 5 mM different amino acids in presence of 0.5 mM acCoA, with 2  $\mu$ M of the enzyme at 30 °C for 30 min. Acetylation was quantified with DTNB reagent as described in the methods section. Cysteine was omitted due to reactivity with DTNB. In addition to canonical amino acids, the  $\beta$ -alanine ( $\beta$ -Ala) and polyamine precursor agmatine (Agmt) were included. Each reaction was performed three times over independent experiments. Source data is provided at the end of the Supplementary information file.

a *AbDpa : EcSpeG*

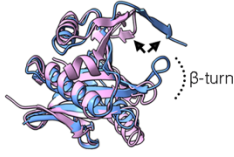

```

Dpa      -----MIVRRATYEDLSQLAVLFDEYRQFYGA-----SSNLEESHFLKQRFENKESVFFIHKDEKITGFLVLLYLGFSVACSTYYILLDDVVYV
EcSpeG   MPSASVHLRPLEREDLRYVQLDNNASVMRYWFEPEYAFVELSDLYDKHIHQSERRFVVEC-DGEKAGLVELV-----EINHVRRAEFQIIIS
          * * * * *
Dpa      P-loop  -----B7--  -----B3  -----B4
          PLFRQGSAAKQLIDTALFAKQ-ENALRISLETQSNNHESHRLYKMGFIRDSEFQTFHCFLK  -----B7  a7
EcSpeG   PEYQKGLAFAAKLAMDYGFVTLNLYKLYLVDKENEKAIHYKRLGFSVEGEL--MHEFFINGQYRNAIRMCIFQHLYLAHEKTPGQTLKPTAQ
          * * * * *
    
```

b *AbDpa : VcSpeG*

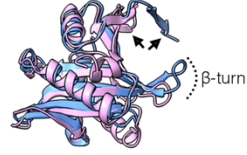

```

Dpa      -----MIVRRATYEDLSQLAVLFDEYRQFYGAS-----SNLEESHFLKQRF-ENKESVFFIHKDEKITGFLVLLYLGFSVACSTYYILLDDVVYV
VcSpeG   SNAMNSQLTLRALERGLRFIHNLN-----NNRNIMSYWFEPEYSEFDELEELYNKHIHDNAERFVVEDAQNLITGLVELI-----EINYIHRSAE
          * * * * *
Dpa      B4  P-loop  -----B7--  -----B3  -----B4
          DDVYVTPFLFRQGSAAKQLIDTALFAKQ-ENALRISLETQSNNHESHRLYKMGFIRDSEFQTFHCFL  -----B7  a7
VcSpeG   FQIIIAPEHQKGFARLTILNBDYFTLNLHKIYLHVAVENPKAVHLYEECGF-----VEEGHLYVEEFFINGRYQDVKRMVILQSKYLNRSE
          * * * * *
    
```

c *AbDpa : AbHpa2 \*AF*

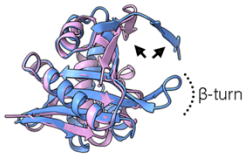

```

Dpa      -MIVRRATYEDLSQLAVLFDEYRQFYGASSNLEESHFLKQRFKAESVFFIHKDEKITGFLVLLYLGFSVACSTYYILLDDVVYV
AbHpa2   MYKVIAGSWTQFEEDAKYIREQVFIQEGIEPKDEW---DDFDSTAVHFMVYKQPIATARL--LPQHSVGR-----VAVLM
          * * * * *
Dpa      P-loop  -----B7--  -----B3  -----B4
          LFRQGSAAKQLIDTALFAKQENALRISLETQSNNHESHRLYKMGF-----IRDSEFQTFHCFL
AbHpa2   LYRKGIGKILMQHIIIEYARQHKLPYLKLSAQ---TYVTAFYEALGFKVQGEVYQDCGIPHIDMTLALS
          * * * * *
    
```

d *AbDpa : SeAac(6)-ly*

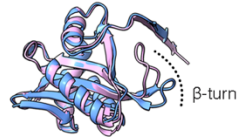

```

Dpa      MIVRRATYEDLSQLAVLFDEYRQFYGASSNLEESHFLKQRFENKESVFFIHKDEKITGFLVLLYLGFSV-AC--STYYILLDDVVYV
AAC6'    MDIRKMRNRLDHWRLKQLWPGHPDDAHLADGEEILQ---ADHLVSIAMADVAIGFADASIRHDYVNGCDSSEVVFLESTFVLP
          * * * * *
Dpa      P-loop  -----B7--  -----B3  -----B4
          FRQGSAAKQLIDTALFAKQENALRISLETQSNNHESHRLYKMGFIRDSE--FQTFHCFLK
AAC6'    FRQGVAKQLIAAVQRWGTNKCREMADSTSPENTISQKVHQALGF-EETERVIFYRKRK
          * * * * *
    
```

e *AbDpa : MmSSAT*

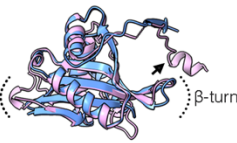

```

Dpa      ---MIVRRATYEDLSQLAVLFDEYRQF-YGASSNLEESHFLKQRFENKESVFFIHK-----DEKITGFLVLLYLGFSVACSTYYI
MmSSAT   MAKFKIRPATASDCSDILRLIKELAKYEMEQVILTEKDLQEDGFGEHPFYHCLVAEVPKEHWPPEGHSIVGFAMYFTYDP-WIGKLLY
          * * * * *
Dpa      B4  P-loop  -----B7--  -----B3  -----B4
          LDDVYVTPFLFRQGSAAKQLIDTALFAKQENALRISLETQSNNHESHRLYKMGFIRDSEFQTFHCFLK  a7
MmSSAT   LEDFFVMSDYRFGIGSEILKNLSQVAMRCRCSMMHFLVAEWNPEPSINFYKRRG-ASDLSSEEGWRLFKIDKEYLLKMATEE
          * * * * *
    
```

f *AbDpa : HsSSAT1*

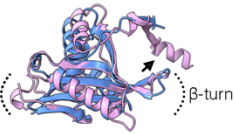

```

Dpa      ---MIVRRATYEDLSQLAVLFDEYRQF-YGASSNLEESHFLKQRFENKESVFFIHK-----DEKITGFLVLLYLGFSVACSTYYI
HsSSAT   MAKFVIRPATAADCSDILRLIKELAKYEMEQVILTEKDLLEDGFGEHPFYHCLVAEVPKEHWPPEGHSIVGFAMYFTYDP-WIGKLLY
          * * * * *
Dpa      B4  P-loop  -----B7--  -----B3  -----B4
          LDDVYVTPFLFRQGSAAKQLIDTALFAKQENALRISLETQSNNHESHRLYKMGFIRDSEFQTFHCFLK  a7
HsSSAT   LEDFFVMSDYRFGIGSEILKNLSQVAMRCRCSMMHFLVAEWNPEPSINFYKRRGASDLSSEEGWRLFKIDKEYLLKMATEE
          * * * * *
    
```

g *AbDpa : ScHpa2*

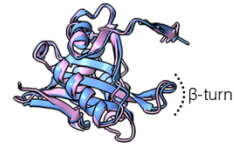

```

Dpa      --MIVRRATYEDLSQLAVLFDEYRQFYGASSNLEESHFLKQRF--KAASVFFIHK-----DEKITGFLVLLYLGFSVACSTYYILLDDVVY
ScHpa2   DNITVRFVTENDREGWRLKSYQDFYEVFP--DOLDDFNFRGRFLDPNKMAVAVAVESSERITGMINFNHMTTDFDKKIYINDLYVD
          * * * * *
Dpa      P-loop  -----B7--  -----B3  -----B4
          PLFRQGSAAKQLIDTALFAKQENALRISLETQSNNHESHRLYKMGFIRDSEFQTFHCFL
ScHpa2   ENSFKVGAQKLIQFVYDEADKLGTPSPVYCTDESNHRAQLLYKRVGYKAPKILYKRKY
          * * * * *
    
```

h *AbDpa : BsPaiA*

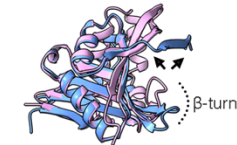

```

Dpa      --MIVRRATYEDL-SQLAVLFDEYRQFYGASSNLEESHFLKQRF-----KAASVFFIHKDEKITGFLVLLYLGFS--SVACSTY
PaiA     MSVKMKKCSREDLQTLQLSIETFNDFTEKQNSPENMKAYLESANFTEQLEKELSNMSSQFFIYDFHEIAGYKYNIDDAQSEEMGAES
          * * * * *
Dpa      B4  P-loop  -----B7--  -----B3  -----B4
          YILLDDVVYVTPFLFRQGSAAKQLIDTALFAKQENALRISLETQSNNHESHRLYKMGFIRD-----SEFQTFHCFL
PaiA     LEIETIVIKNSFQKHGKQKHLNKAIEIALEARNKNIWLGWKEKNEAIAFYKMGFVQGAHSFYMGEDEQTLIMAKPTLILE
          * * * * *
    
```

i *AbDpa : BsBltD \*AF*

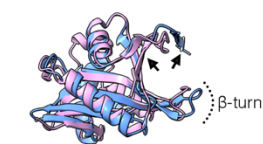

```

Dpa      --MIVRRATYEDLSQLAVLFDEYRQFYGASSNLEESHFLKQRFENKESVFFIHKDEKITGFLVLLYLGFS--SVACSTYYILLDDVVY
BltD     MSINIKAVTDDNRAAILDLHVSQNLQSYIES-TKVCLEDAKE--CHYYKPVGLYI-EGDLVGFAMYGLPEYDEDNKNGRWLDRFFID
          * * * * *
Dpa      P-loop  -----B7--  -----B3  -----B4
          PLFRQGSAAKQLIDTALFAKQ-ENALRISLETQSNNHESHRLYKMGF-----IRDSEFQTFHCFL
BltD     ERYQKGLGKMLKALIQHLAELYKCKRIYLSIFENNIHAIRLYRFGFQFNGELDFNGEKVMVKEL
          * * * * *
    
```

## Supplementary Fig. S6 | Structure and sequence alignments of different GNAT

**acetyltransferases reported to acylate polyamines.** (a) *A. baumannii* Dpa monomer alignment with *E. coli* SpeG (PDB:[4R9M](#); *r.m.s.d.* = 6.88), (b) with *V. cholerae* SpeG (PDB:[4JLY](#), *r.m.s.d.* = 4.996), (c) with *A. baumannii* Hpa2 (AlphaFold2 model, ptm = 0.9; *r.m.s.d.* = 8.271), (d) with *S. enterica* Aac(6')-Iy (PDB:[1S5K](#); *r.m.s.d.* = 4.077), (e) with mouse SSAT (PDB:[3BJ7](#); *r.m.s.d.* = 3.79), (f) with human SSAT (PDB:[2B5G](#); *r.m.s.d.* = 3.649), (g) with yeast Hpa2 (PDB: [1QSO](#); *r.m.s.d.* = 2.588.), (h) with *B. subtilis* PaiA (PDB: [1TIQ](#); *r.m.s.d.* = 7.289) and (i) with *B. subtilis* BItD (AlphaFold2 model, ptm= 0.85; *r.m.s.d.* = 6.687). Conserved P-loop structure that coordinates acCoA binding is boxed, and variable  $\beta$ -turn regions and C-terminal elements are indicated.

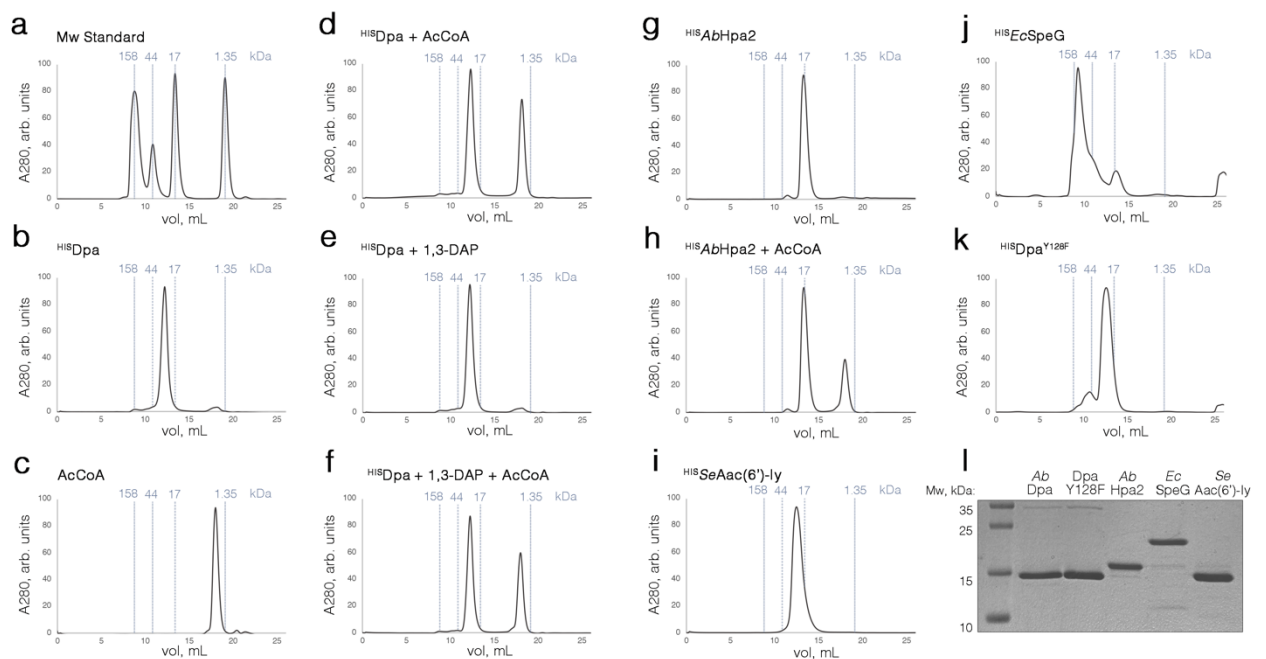

**Supplementary Fig. S7 | Analytical size exclusion chromatography.** (a) Molecular weight standards (BioRad) migrated on Superdex75 1030 increase column in the same running conditions as all the following samples. (b) Analytic SEC of Dpa enzyme alone, (c) acetyl-Coenzyme A, (d) Dpa premixed with 5-fold molar excess of acetyl-Coenzyme A or (e) 1,3-DAP or (f) both acCoA and 1,3-DAP an hour before the run. (g) Analytic SEC of *A. baumannii* Hpa2 alone or (h) premixed



with 5-fold molar excess of acCoaA. (i) Analytic SEC of *S. enterica* Aac(6')-Iy, (j) of *E. coli* SpeG, (k) of *A. baumannii* DpaY128F mutant. (l) SDS-PAGE gel analysis of proteins used for analytic SEC analysis. Protein purifications have been performed three times for all proteins and more than five times for Dpa and its mutated derivative, representative SDS-PAGE migration is shown.

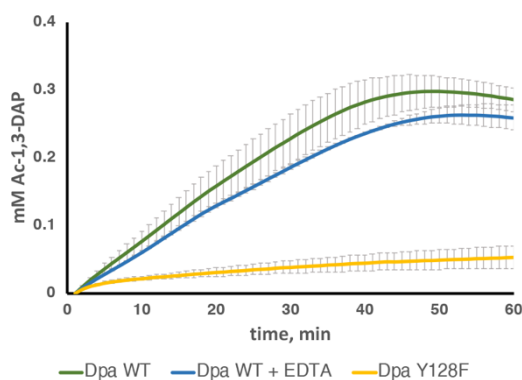

**Supplementary Fig. S8 | 1,3-DAP acetylation kinetics.** Dpa wild-type (WT), mutated Dpa<sub>Y128F</sub> enzyme or Dpa treated with 50 mM EDTA overnight and re-purified by SEC, were used at a concentration of 2  $\mu$ M with 10 mM of 1,3-DAP, 0.5 mM acCoA and 0.2 mM of DTNB. 10 mM EDTA was additionally added to the reaction of EDTA-pre-treated enzyme (Dpa WT + EDTA condition). Reactions were measured with microplate reader every 2 minutes for 1 hour. The average of three measurements is plotted; error bars show standard deviations. Each reaction was performed three times over independent experiments. Source data is provided at the end of the Supplementary information file.



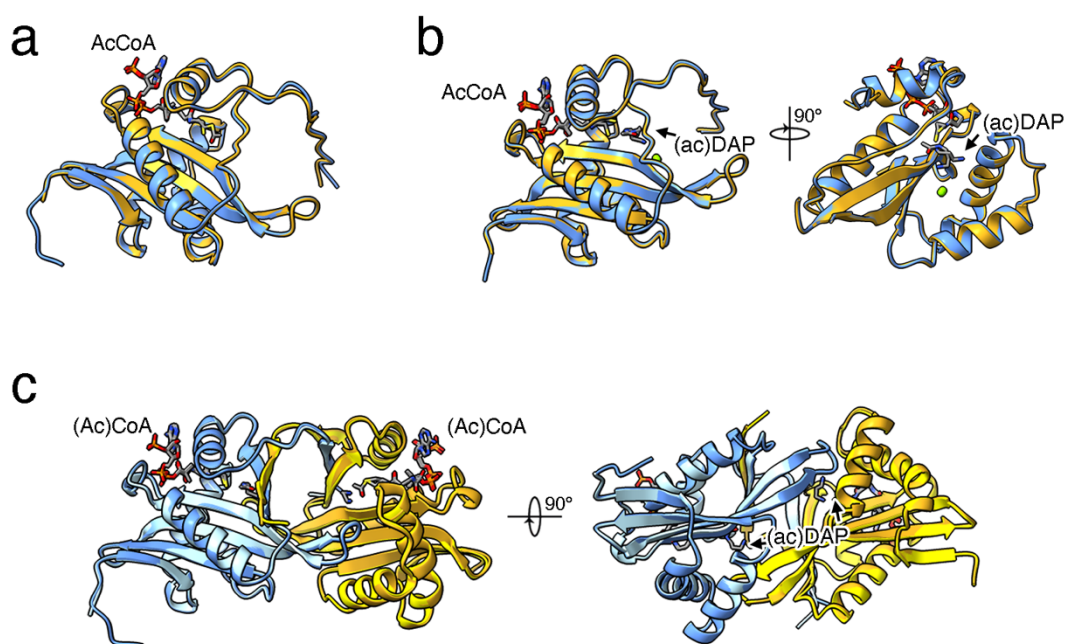

**Supplementary Fig. S9 | Differences between monomers in Dpa crystal structures. (a)**

Alignment of acCoA bound Dpa monomers shown in blue and yellow; *r.m.s.d.*= 0.402. (b)

Alignment of 1,3-DAP and acetyl-1,3-DAP bound monomers; *r.m.s.d.* = 0.302. (c) Alignment of

free and (ac)-1,3-DAP bound dimers shown in darker and lighter tones of blue and yellow; *r.m.s.d.*

= 0.282.

**Supplementary Table S1 | X-ray data collection and processing.**

The  $CC_{1/2}$  criterion was used to determine the resolution range. Values for the outer shell are given in parentheses.

| Sample                         | DpA             | DpA-1,3DAP complex |
|--------------------------------|-----------------|--------------------|
| Diffraction source             | Soleil PX2      | Soleil PX2         |
| Wavelength (Å)                 | 0.98015         | 0.9801             |
| Temperature (K)                | 100.0           | 100.0              |
| Detector                       | Eiger-X 16M     | Eiger-X 16M        |
| Crystal-detector distance (mm) | 189.6           | 216.0              |
| Rotation range per image (°)   | 0.1             | 0.1                |
| Exposure time per image (s)    | 0.01            | 0.01               |
| Space group                    | P2 <sub>1</sub> | P2 <sub>1</sub>    |
| <i>a, b, c</i> (Å)             | 43.3 69.3 55.8  | 42.9 68.1 55.7     |
| $\alpha, \beta, \gamma$ (°)    | 90.0 109.1 90.0 | 90.0 109.1 90.0    |
| Mosaicity (°)                  | 0.2             | 0.2                |
| Resolution range (Å)           | 69.30 – 1.59    | 41.66 - 1.85       |
| Total N°. of reflections       | 261030 (13389)  | 114641 (8723)      |
| N°. of unique reflections      | 37959 (2163)    | 25128 (2407)       |

|                                                     |               |               |
|-----------------------------------------------------|---------------|---------------|
| Completeness                                        | 90.07 (51.65) | 97.37 (92.52) |
| Redundancy                                          | 6.9 (6.6)     | 4.6 (3.6)     |
| $\langle I/\sigma(I) \rangle$                       | 14.55 (1.72)  | 8.43 (0.70)   |
| $CC_{1/2}$                                          | 0.996 (0.695) | 0.996 (0.418) |
| $R_{\text{pim}}$                                    | 0.033 (0.394) | 0.054 (0.670) |
| Overall $B$ factor / Wilson plot ( $\text{\AA}^2$ ) | 19.99         | 34.39         |
| R-factor (%)                                        | 18.2 (27.8)   | 19.6 (41.1)   |
| $R_{\text{free}}$ -factor (%)                       | 20.7 (26.6)   | 23.2 (48.9)   |
| Ramachandran profile (%)                            |               |               |
| Core                                                | 99.3          | 98.6          |
| Allowed                                             | 0.7           | 1.4           |
| Outliers                                            | 0.0           | 0.0           |
| R.m.s. deviations                                   |               |               |
| Bond lengths ( $\text{\AA}$ )                       | 0.012         | 0.011         |
| Bond angles ( $^\circ$ )                            | 1.56          | 1.53          |
| Number of atoms                                     | 2942          | 2882          |
| Macromolecules                                      | 2514          | 2521          |
| Solvent                                             | 307           | 236           |
| Other                                               | 121           | 125           |
| B-factors ( $\text{\AA}^2$ )                        |               |               |
| All atoms                                           | 25.0          | 36.1          |
| Macromolecules                                      | 23.3          | 35.0          |
| Solvent atoms                                       | 38.9          | 46.7          |
| Other atoms                                         | 25.2          | 39.5          |
| PDB ID                                              | 8A9O          | 8A9N          |

### Supplementary Table S2 | Primers used in the study.

| Primer name | Sequence 5'-3'                                 | Purpose                                                      | Reference |
|-------------|------------------------------------------------|--------------------------------------------------------------|-----------|
| 5FR_F       | CAACAGTTATTTGCAGATCGT                          | Amplification of upstream region of <i>dpa</i>               | This work |
| 5FR_R       | ACTCACTGTCTCTAATAAACCTAGG<br>CGCTCCTTGTATTTATG |                                                              |           |
| 3FR_F       | GGTTTATTAGAGACAGTGAGT                          | Amplification of downstream region of <i>dpa</i>             | This work |
| 3FR_R       | GTCGAGGCATTTCTGTCCTAGGTGA<br>TCTTACCCACTACA    |                                                              |           |
| F_Dpa_AcOR  | TATTGCATGCTTGTAAGACGAGCGA                      | Amplification of <i>dpa</i> gene for complementation plasmid | This work |
| I_Ptac      |                                                |                                                              |           |

|                      |                                                                |                                                                            |              |
|----------------------|----------------------------------------------------------------|----------------------------------------------------------------------------|--------------|
| R_Dpa_AcOR<br>I_Ptac | GATGGTACCGGGATTGGGTATATTT<br>GTCG                              |                                                                            |              |
| F-hisDpa-Eco         | GATCGAATTCATGCACCACCACCAC<br>CACCACATGATTGTAAGACGAGCG          | Amplification of <i>A. baumannii dpa</i> gene for protein expression       | This work    |
| R-Dpa-Pst            | GATCCTGCAGTTATTTAAGAAAACA<br>ATGAAATGT                         |                                                                            |              |
| F-SpeG-Eco           | GATCGAATTCATGCACCACCACCAC<br>CACCACATGCCAAGCGCCCACAGT<br>GTTA  | Amplification of <i>E. coli speG</i> gene for protein expression           | This work    |
| R-SpeG-Pst           | GATCCTGCAGCTATTGTGCGGTCGG<br>CTTCAGG                           |                                                                            |              |
| F-abHpa2-Eco         | GATCGAATTCATGCACCACCACCAC<br>CACCACATGTATAAAGTTATAGCG<br>GGTAG | Amplification of <i>A. baumannii hpa2</i> gene for protein expression      | This work    |
| R-abHpa2-Pst         | GATCCTGCAGTCAACTTAACGCTAA<br>AGTCATATCAA                       |                                                                            |              |
| F-Aac6p-Eco          | GATCGAATTCATGCACCACCACCAC<br>CACCACATGGACATCAGGCAAATG<br>AACA  | Amplification of <i>S. enterica aac(6')-Iy</i> gene for protein expression | This work    |
| R-Aac6p-Pst          | GATCCTGCAGTCAACAACGCTTTTCG<br>GTAGAA                           |                                                                            |              |
| F-Dpa- Y128F         | TTCGAAAAAATGGGGTTTATTAGA<br>G                                  | Y128F mutation in Dpa                                                      | This work    |
| R-Dpa- Y128F         | GAGGCGGTGAGATTCATGA                                            |                                                                            |              |
| dpa_qF               | TAGATGATGTATATGTTACTCC                                         | qPCR                                                                       | This work    |
| dpa_qR               | GGGTTTCTAGGCTAATACGT                                           |                                                                            |              |
| rpoB_qF              | CGATTCGTACAGAACATTCTT                                          | qPCR (housekeeping gene)                                                   | <sup>1</sup> |

|         |                       |      |   |
|---------|-----------------------|------|---|
| rpoB_qR | TAAAGCAGCATTGCCAGAATA |      |   |
| tuf_qF  | GAAGCGAAAGATTACTCACAA | qPCR | 1 |
| tuf_qR  | CAGTGATCATGTTTTAACGTA |      |   |

**Supplementary Table S3 | Amino acid sequences of acetyltransferases used in this study.**

| Host                | Protein     | Protein sequence                                                                                                                                                                                                 |
|---------------------|-------------|------------------------------------------------------------------------------------------------------------------------------------------------------------------------------------------------------------------|
| <i>A. baumannii</i> | His-Dpa     | MHHHHHHMIVRRATYEDLSQLAVLFDEYRQFYGASSNLEESH<br>HFLKQRFENKESVFFIHIKDEKITGFVLLYLGFSVACSTYYILD<br>DVYVTPLFRRQGSQAKQLIDTAILFAKQENALRISLETQSNNHES<br>HRLYEKMGFIRDSEFQTFHCFLK                                           |
| <i>E. coli</i>      | His-SpeG    | MHHHHHHMPSAHSVKLRPLEREDLRYVHQLDNNASVMRYWF<br>EOPYEAFVELSDLYDKHIHDQSERRFVVECDGEKAGLVELVEIN<br>HVHRRAEFQIIISPEYQGKGLATRAAKLAMDYGFTVLNLYKLY<br>LIVDKENEKAIHIYRKLGFVVEGELMHEFFINGQYRNAIRMCIFQ<br>HQYLAEHKTPGQTLKPTAQ |
| <i>S. enterica</i>  | His-Aac(6') | MHHHHHHMDIRQMNRTLHDHWRGLRKQLWPGHPDDAHLAD<br>GEEILQADHLVSFIAMADGVAIGFADASIRHDYVNGCDSSPVVF<br>LEGIFVLPSFRQRGVAKQLIAAVQRWGNTKGCREMASDTSPEN<br>TISQKVHQUALGFEETERVIFYRKRC                                            |
| <i>A. baumannii</i> | His-Hpa2    | MHHHHHHMYKVIAGSWTQFEEDAKYIREQVFIQEQQIEPKDE<br>WDDFDSTAVHFMVYDKEQPIATARLLPQHSVGRVAVLMLYRK<br>QGIGKILMQHIEYARQHKLPLYLKLKLSAQTYVTAFYEALGFKVQ<br>GEVYQDCGIPHIDMTLALS                                                 |

## Supplementary Methods

### Antibiotic resistance tests.

For antibiotic resistance tests, cultures of DJ624 $\Delta$ ara cells transformed with pKK223.3 vectors carrying different acetyltransferase enzymes were grown to optical density of  $A_{600} = 0.5$ , induced with 0.5 mM IPTG for 2 hours and a quantity of 0.5 OD unit of cells was spread on the solid LB agar containing 0.5 mM IPTG. Sterile Whatmann discs soaked in different concentrations of antibiotics were placed on the agar with bacteria and plates were incubated overnight revealing zones of growth inhibition. Amount equal to 0.1 OD unit of cells used for these experiments were boiled in protein loading buffer, migrated on 15% SDS-PAGE gel, proteins were transferred onto PVDF membrane, and expression of enzymes was confirmed by western-blot with antibodies against his-tag (Sigma, ref. no. H1029, diluted 1:5000) followed by recognition with goat anti-mouse IgG-Alkaline Phosphatase antibodies (Sigma, A3562, diluted 1:5000) and detection with BCIP/NBT chromogenic substrate (Roche).

## Supplementary References

1. Armalytė, J., Jurėnas, D., Krasauskas, R., Čepauskas, A. & Sužiedėlienė, E. The higBA Toxin-Antitoxin Module From the Opportunistic Pathogen *Acinetobacter baumannii* - Regulation, Activity, and Evolution. *Front Microbiol* **9**, 732 (2018).

## Supplementary Source Data.

| Supplementary Figure S2a. Twitching motility |              |         |                   |        |                  |        |                  |        |                  |        |                  |       |
|----------------------------------------------|--------------|---------|-------------------|--------|------------------|--------|------------------|--------|------------------|--------|------------------|-------|
| condition                                    |              |         |                   |        |                  |        |                  |        |                  |        |                  |       |
| WT                                           | $\Delta$ dpa | WT +DAP | $\Delta$ dpa +DAP | WT PUT | $\Delta$ dpa PUT | WT CAD | $\Delta$ dpa CAD | WT SPD | $\Delta$ dpa SPD | WT SPM | $\Delta$ dpa SPM |       |
|                                              | 0.68         | 1.87    | 1.24              | 0.74   | 1.829            | 2.5    | 2.033            | 3.297  | 1.785            | 1.932  | 1.063            | 1.343 |
|                                              | 1.21         | 2.01    | 1.33              | 0.98   | 1.252            | 2.683  | 2.222            | 2.248  | 1.239            | 1.651  | 0.942            | 1.258 |
|                                              | 1.14         | 3.33    | 1.61              | 1.51   | 1.645            | 2.864  | 1.754            | 2.207  | 1.916            | 2.434  | 1.267            | 1.473 |
|                                              | 1.75         | 2.20    | 1.69              | 1.51   | 2.009            | 3.444  | 0.947            | 2.807  | 1.882            | 2.601  | 0.957            | 0.93  |
|                                              | 1.31         | 3.58    | 1.45              | 0.95   |                  |        |                  |        |                  |        |                  |       |
|                                              | 1.155        | 2.863   | 2.873             | 1.854  |                  |        |                  |        |                  |        |                  |       |
|                                              | 2.415        | 2.822   | 2.157             | 1.16   |                  |        |                  |        |                  |        |                  |       |
|                                              | 2.017        | 3.342   | 2.751             | 1.613  |                  |        |                  |        |                  |        |                  |       |
| area                                         | 1.727        | 3.067   | 3.008             | 1.993  |                  |        |                  |        |                  |        |                  |       |

| Supplementary Figure S2b. Biofilm formation |              |            |                   |            |                  |            |                  |            |                  |            |                  |            |
|---------------------------------------------|--------------|------------|-------------------|------------|------------------|------------|------------------|------------|------------------|------------|------------------|------------|
| condition                                   |              |            |                   |            |                  |            |                  |            |                  |            |                  |            |
| WT                                          | $\Delta$ dpa | WT +DAP    | $\Delta$ dpa +DAP | WT PUT     | $\Delta$ dpa PUT | WT CAD     | $\Delta$ dpa CAD | WT SPD     | $\Delta$ dpa SPD | WT SPM     | $\Delta$ dpa SPM |            |
| 4.1442682                                   | 1.83035672   | 4.47494198 | 1.29200025        | 4.16247868 | 1.68693533       | 3.87947314 | 3.49770757       | 4.83572185 | 2.15234544       | 4.4340171  | 1.69093651       |            |
| 4.6313483                                   | 1.495617     | 5.20078991 | 1.17698387        | 4.63626979 | 1.09033186       | 4.83734775 | 2.47414235       | 4.64174068 | 1.53865329       | 4.16871309 | 1.17047403       |            |
| 3.51391879                                  | 2.12134291   | 2.9201305  | 2.53212873        | 3.32132712 | 1.91638488       | 3.44512704 | 1.86421387       | 5.12065639 | 2.49397309       | 4.07657786 | 2.272399         |            |
| OD 580/600 nm                               | 5.07853736   | 1.49116318 | 4.71617671        | 1.81397438 | 4.93093454       | 1.36592535 | 4.10154792       | 1.5015702  | 5.17743446       | 1.7715699  | 3.34942302       | 1.91985843 |

| Supplementary Figure S3c     |      |            |            |            |            |            |            |            |            |  |  |  |
|------------------------------|------|------------|------------|------------|------------|------------|------------|------------|------------|--|--|--|
| Raw data for enzyme kinetics |      |            |            |            |            |            |            |            |            |  |  |  |
| mM, 1,3DAP                   |      | time, min  |            |            |            |            |            |            |            |  |  |  |
| replicate 1                  |      | 1          | 2          | 5          | 10         | 15         | 30         | 45         | 60         |  |  |  |
|                              | 2    | 0.11734287 | 0.00365141 | 0.09126163 | 2.37113713 | 7.43116159 | 16.258206  | 22.5722516 | 29.2268739 |  |  |  |
|                              | 5    | 0.46922364 | 3.29785225 | 8.69437934 | 17.1959941 | 18.2424669 | 29.0552508 | 36.3369892 | 51.1157017 |  |  |  |
|                              | 7.5  | 1.77038165 | 2.74848844 | 11.5140404 | 17.659562  | 21.3386015 | 35.0666868 | 52.5655289 | 62.4198547 |  |  |  |
|                              | 10   | 2.0416458  | 3.39746464 | 10.184943  | 16.7906474 | 23.6117224 | 44.5122529 | 61.8599106 | 68.2686592 |  |  |  |
|                              | 12.5 | 4.21830951 | 13.1317563 | 19.9004712 | 37.7616419 | 48.3796367 | 76.1377751 | 88.5912513 | 93.7642275 |  |  |  |
|                              | 15   | 8.66048126 | 13.431821  | 19.7918917 | 35.8269947 | 54.4572624 | 78.5773493 | 89.4298123 | 95.3317603 |  |  |  |
| replicate 2                  |      | 1          | 2          | 5          | 10         | 15         | 30         | 45         | 60         |  |  |  |
|                              | 2    | 0.48805022 | 2.2549676  | 5.09624888 | 7.99700281 | 10.6240178 | 20.3711833 | 24.2896076 | 31.1238713 |  |  |  |
|                              | 5    | 3.41762644 | 4.77755545 | 9.98168089 | 16.8561664 | 19.6376214 | 32.7310235 | 41.1868733 | 48.29908   |  |  |  |
|                              | 7.5  | 1.92515518 | 2.41218022 | 10.2402794 | 17.4599222 | 24.4688541 | 37.3214912 | 51.2688215 | 61.98171   |  |  |  |
|                              | 10   | 3.19015421 | 4.55222948 | 10.46484   | 17.0965487 | 24.4250707 | 46.2765253 | 63.0828252 | 68.0155776 |  |  |  |
|                              | 12.5 | 5.61000749 | 13.6200346 | 18.8258257 | 38.0225894 | 51.1487025 | 78.3546755 | 90.6770658 | 94.340592  |  |  |  |
|                              | 15   | 10.5530897 | 15.9139498 | 23.2725994 | 39.5631235 | 56.78919   | 81.3371711 | 90.9108846 | 96.2413868 |  |  |  |
| replicate 3                  |      | 1          | 2          | 5          | 10         | 15         | 30         | 45         | 60         |  |  |  |
|                              | 2    | 1.32468208 | 1.83314172 | 3.80187289 | 6.81518291 | 9.67762334 | 21.4200832 | 24.1346115 | 31.9674018 |  |  |  |
|                              | 5    | 2.9459743  | 4.48441325 | 10.9167158 | 17.083421  | 19.3760488 | 32.4879057 | 41.6469779 | 51.6441552 |  |  |  |
|                              | 7.5  | 2.38407451 | 4.03475508 | 10.3805281 | 18.6503525 | 21.8767212 | 36.5708233 | 52.0734231 | 62.2835075 |  |  |  |
|                              | 10   | 3.492194   | 3.635445   | 12.1912126 | 18.5136678 | 25.2126476 | 45.9871303 | 63.5894441 | 69.1502639 |  |  |  |
|                              | 12.5 | 6.91728998 | 13.9315337 | 19.5843059 | 41.0839354 | 51.4790504 | 78.8135847 | 90.9406659 | 94.6525299 |  |  |  |
|                              | 15   | 11.8514298 | 17.8085052 | 24.4826223 | 39.3825173 | 57.0124546 | 81.6123227 | 90.9376717 | 96.3997087 |  |  |  |

| Supplementary Figure S4c                  |            |            |            |            |            |            |            |            |            |              |              |              |
|-------------------------------------------|------------|------------|------------|------------|------------|------------|------------|------------|------------|--------------|--------------|--------------|
| Acetylation of antibiotics by DTNB method |            |            |            |            |            |            |            |            |            |              |              |              |
| substrate                                 | enzyme     |            |            |            |            |            |            |            |            |              |              |              |
|                                           | AbDpa      | AbDpa      | AbDpa      | EcSpeG     | EcSpeG     | EcSpeG     | AbHpa2     | AbHpa2     | AbHpa2     | SeAac(6')-ly | SeAac(6')-ly | SeAac(6')-ly |
| STRP                                      | 0.00482331 | 0.00330272 | 0.00281613 | 0.02769296 | 0.02720637 | 0.02787543 | 0.00330272 | 0.00281613 | 0.00214707 | 0.0071346    | 0.00409342   | 0.00415425   |
| KAN                                       | -0.0084971 | -0.0024147 | -0.0038136 | 0.01698802 | 0.0218539  | 0.02221884 | -0.0093486 | -0.0049085 | -0.0028405 | 0.34586096   | 0.39537133   | 0.43630558   |
| GENT                                      | -0.0045435 | -0.0098352 | -0.0046043 | 0.01966425 | 0.01005413 | 0.01139225 | -0.0065507 | -0.0102609 | -0.0095919 | 0.39512803   | 0.38892403   | 0.46817712   |
| AMIKA                                     | 0.00056566 | 0.0009306  | -0.0004683 | 0.02422602 | 0.02349614 | 0.02361778 | 0.00232954 | -0.0013807 | -0.0007116 | 0.16272125   | 0.17281796   | 0.18553008   |
| TOBRA                                     | -0.006794  | -0.0163433 | -0.0153093 | 0.02343531 | 0.01431178 | 0.01224378 | -0.0038745 | -0.0087403 | -0.0102001 | 0.28886929   | 0.35303814   | 0.36167508   |

**Supplementary Figure S5e**

Acetylation of amino acids by DTNB method

| substrate | enzyme     |            |            |            |            |            |              |              |              |            |            |            |
|-----------|------------|------------|------------|------------|------------|------------|--------------|--------------|--------------|------------|------------|------------|
|           | AbDpa      | AbDpa      | AbDpa      | AbHpa2     | AbHpa2     | AbHpa2     | SeAac(6')-ly | SeAac(6')-ly | SeAac(6')-ly | EcSpeG     | EcSpeG     | EcSpeG     |
| Arg       | 0.00169179 | 0.00826087 | 0.00285696 | 0.1195035  | 0.14557749 | 0.1306361  | 0.00577074   | 0.00280578   | 0.00311016   | 0.03277968 | 0.03422856 | 0.0385436  |
| His       | 0.00282327 | 0.00369269 | 0.00248257 | 0.07786398 | 0.07334602 | 0.07051902 | 0.00145638   | 0.00051786   | 0.00649397   | 0.01371802 | 0.02095236 | 0.02296506 |
| Lys       | 0.00796703 | 0.00485361 | 0.00395809 | 0.02450991 | 0.02365709 | 0.02401236 | 0.00368572   | 0.00789478   | 0.0045956    | 0.01134168 | 0.00895228 | 0.00882292 |
| Asp       | 0.00062284 | 0.00302683 | 0.000111   | 0.00733616 | 0.00288114 | 0.0003637  | -0.0011532   | -0.0010029   | 0.0008875    | 0.00028053 | 0.00040899 | 0.00028316 |
| Glu       | 0.0074315  | 0.00883609 | 0.0079819  | 0.00573074 | 0.00708044 | 0.0077857  | 0.00749915   | 0.00383908   | 0.00955434   | 0.0100808  | 0.00804303 | 0.00854117 |
| Ser       | 0.0037669  | 0.00946688 | 0.01077745 | 0.1002322  | 0.12861336 | 0.12422757 | 0.00263756   | 0.00705604   | 0.00466535   | 0.08236017 | 0.08234187 | 0.06402658 |
| Thr       | 0.00553008 | 0.00385926 | 0.00294929 | 0.69368936 | 0.62690853 | 0.64827499 | 0.00064735   | 0.00227721   | 0.00232179   | 0.30134831 | 0.29227764 | 0.30703259 |
| Asn       | 0.00840388 | 0.00844643 | 0.00891265 | 0.01137694 | 0.01172816 | 0.01057566 | 0.00476244   | 0.00671961   | 0.00604953   | 0.00783801 | 0.01392177 | 0.01000898 |
| Gln       | 0.01190651 | 0.013574   | 0.00701953 | 0.00942108 | 0.01025059 | 0.01046339 | 0.00495506   | 0.00493202   | 0.00243648   | 0.01188273 | 0.01926508 | 0.01379379 |
| Gly       | 0.00677855 | 0.00931192 | 0.00356725 | 0.01449159 | 0.01131224 | 0.00851551 | 0.00238036   | 0.00089003   | 0.00149106   | 0.02579958 | 0.00365538 | 0.01170028 |
| Pro       | 0.00451039 | 0.00147415 | 0.01161939 | 0.00771057 | 0.00207697 | 0.0107598  | 0.00429943   | 0.00575574   | 0.00468414   | 0.00224844 | 0.01040894 | 0.01529322 |
| Ala       | 0.00976813 | 0.00476831 | 0.00512589 | 0.00432359 | 0.00973954 | 0.00432941 | 0.00186008   | 0.0041466    | 0.0019542    | 0.01063442 | 0.00804844 | 0.01537167 |
| Ile       | 0.00953588 | 0.01075953 | 0.00921045 | 0.01021472 | 0.00912811 | 0.01058168 | 0.00526384   | 0.00354812   | 0.00820606   | 0.01831893 | 0.01133747 | 0.0170214  |
| Leu       | 0.00901468 | 0.01211177 | 0.00788119 | 0.00702262 | 0.01421907 | 0.00813191 | 0.00623136   | 0.00617227   | 0.01011801   | 0.01489416 | 0.01233182 | 0.01988711 |
| Met       | 0.00454445 | 0.00824306 | 0.00589627 | 0.00870033 | 0.01204806 | 0.01110837 | 0.00208477   | 0.0014461    | 0.00406221   | 0.00839001 | 0.01700445 | 0.01668438 |
| Phe       | 0.00819931 | 0.00505837 | 0.00668325 | 0.01010297 | 0.01837487 | 0.01868737 | 0.00183464   | 0.006466     | 0.00445541   | 0.01325403 | 0.01445412 | 0.0130202  |
| Trp       | 0.0028106  | 0.01461203 | 0.01004278 | 0.21580552 | 0.42628457 | 0.4050816  | 0.00365534   | 0.00215496   | 0.00591789   | 0.0997347  | 0.09286092 | 0.10291514 |
| Tyr       | 0.0115506  | 0.01183584 | 0.01325752 | 0.06726433 | 0.20654531 | 0.2123586  | 0.00895608   | 0.00707691   | 0.01438933   | 0.04715364 | 0.03425317 | 0.0424683  |
| Val       | 0.00419011 | -0.0019433 | -0.0037194 | 0.01069275 | 0.00044864 | -0.0010078 | -0.0023811   | -0.0030523   | -0.0030735   | 0.00760592 | 0.00799457 | 0.00975159 |
| beta-Ala  | -0.0010239 | -0.0008292 | 0.00464794 | 0.00835248 | 0.00746463 | 0.00841244 | 0.00168846   | 0.00392891   | -0.0034437   | 0.01105343 | 0.01477645 | 0.01193931 |
| Agmt      | 0.01619912 | 0.01475953 | 0.01199687 | 0.03323548 | 0.05158979 | 0.04765952 | 0.00723435   | 0.01270617   | 0.00740883   | 0.40623155 | 0.42754547 | 0.38861213 |



| Supplementary Figure S8.                 |            |            |            |            |            |            |            |            |            |
|------------------------------------------|------------|------------|------------|------------|------------|------------|------------|------------|------------|
| 1,3-DAP kinetics measured by DTNB method |            |            |            |            |            |            |            |            |            |
| time, min                                | Dpa WT     | Dpa WT     | Dpa WT     | Dpa WT+EDT | Dpa WT+EDT | Dpa WT+EDT | DpaY128F   | DpaY128F   | DpaY128F   |
| 1                                        | 7.9071E-05 | 0.00038319 | 0.00044401 | 0.00032236 | 0.00044401 | 0.00032236 | 0.00044401 | 0.00056566 | 0.00044401 |
| 2                                        | 0.01218296 | 0.00956754 | 0.00914178 | 0.00865519 | 0.0084119  | 0.00804696 | 0.00749954 | 0.00603978 | 0.00658719 |
| 3                                        | 0.02319202 | 0.01869108 | 0.01777872 | 0.01613649 | 0.01577155 | 0.01510249 | 0.01206131 | 0.00968919 | 0.01066237 |
| 4                                        | 0.03468767 | 0.02574661 | 0.02446931 | 0.02307037 | 0.02252296 | 0.02191473 | 0.01492002 | 0.01200049 | 0.01339943 |
| 5                                        | 0.04527097 | 0.03322791 | 0.03182896 | 0.02927438 | 0.02878779 | 0.02817955 | 0.01747461 | 0.01419013 | 0.01589319 |
| 6                                        | 0.05524603 | 0.04101332 | 0.0388845  | 0.03541755 | 0.03517426 | 0.03468767 | 0.01936014 | 0.0156499  | 0.01783955 |
| 7                                        | 0.06509945 | 0.04825132 | 0.04557509 | 0.04125661 | 0.04119579 | 0.04143909 | 0.02088073 | 0.01692719 | 0.01972508 |
| 8                                        | 0.07458792 | 0.05597591 | 0.0523265  | 0.04727815 | 0.04721732 | 0.04855544 | 0.0220972  | 0.01777872 | 0.02112402 |
| 9                                        | 0.08389392 | 0.06363968 | 0.0595645  | 0.05366462 | 0.05342132 | 0.05585427 | 0.02331367 | 0.0187519  | 0.02282708 |
| 10                                       | 0.09368652 | 0.07130345 | 0.06649839 | 0.06011192 | 0.05986862 | 0.06278815 | 0.0239219  | 0.01905602 | 0.02380026 |
| 11                                       | 0.10341828 | 0.07921051 | 0.07373639 | 0.06649839 | 0.06680251 | 0.07026945 | 0.0251992  | 0.02009002 | 0.02538167 |
| 12                                       | 0.1130284  | 0.08705675 | 0.08127851 | 0.0734931  | 0.07373639 | 0.07781157 | 0.02611155 | 0.02075908 | 0.02696308 |
| 13                                       | 0.12349006 | 0.09472052 | 0.0882124  | 0.08042698 | 0.08085275 | 0.08559698 | 0.02665896 | 0.02094155 | 0.02799708 |
| 14                                       | 0.13334347 | 0.10281005 | 0.09581534 | 0.08730004 | 0.0882124  | 0.09259169 | 0.02763214 | 0.02179308 | 0.02939602 |
| 15                                       | 0.14398759 | 0.10980476 | 0.10238428 | 0.0944164  | 0.09526793 | 0.10007299 | 0.02836202 | 0.02221884 | 0.03073414 |
| 16                                       | 0.15414512 | 0.11759017 | 0.10968311 | 0.10122864 | 0.10220181 | 0.10743264 | 0.02945685 | 0.02294873 | 0.03219391 |
| 17                                       | 0.16448513 | 0.12494982 | 0.11673864 | 0.10816252 | 0.10919652 | 0.11473146 | 0.03030838 | 0.02361778 | 0.03341038 |
| 18                                       | 0.17427772 | 0.13218782 | 0.12336841 | 0.11485311 | 0.11606958 | 0.12172617 | 0.03097743 | 0.0239219  | 0.03462685 |
| 19                                       | 0.18364455 | 0.13948665 | 0.13048476 | 0.12105711 | 0.12215194 | 0.12829512 | 0.03182896 | 0.02459096 | 0.03608661 |
| 20                                       | 0.19191655 | 0.14623806 | 0.13693206 | 0.12689617 | 0.12835594 | 0.13413418 | 0.03268049 | 0.0251992  | 0.03724226 |
| 21                                       | 0.20012773 | 0.15341524 | 0.14380512 | 0.13224865 | 0.13383006 | 0.14015571 | 0.03298461 | 0.02544249 | 0.03827626 |
| 22                                       | 0.20797397 | 0.1602883  | 0.15043489 | 0.13772277 | 0.13893924 | 0.14550818 | 0.03401861 | 0.02611155 | 0.03961438 |
| 23                                       | 0.21612432 | 0.16728301 | 0.15694301 | 0.14337936 | 0.14502159 | 0.15092148 | 0.0345052  | 0.02647649 | 0.04040508 |
| 24                                       | 0.22421386 | 0.1739736  | 0.16345113 | 0.14915759 | 0.15055654 | 0.15676054 | 0.03529591 | 0.02690226 | 0.04162156 |
| 25                                       | 0.23169515 | 0.18090749 | 0.1700809  | 0.15475336 | 0.15627395 | 0.1623563  | 0.03632991 | 0.02769296 | 0.04308132 |
| 26                                       | 0.23881151 | 0.1879022  | 0.17689313 | 0.16059242 | 0.16223466 | 0.16789125 | 0.03687732 | 0.02799708 | 0.04399367 |
| 27                                       | 0.24750928 | 0.19416702 | 0.18297549 | 0.16630984 | 0.16801289 | 0.17385196 | 0.03742473 | 0.02824037 | 0.04502767 |
| 28                                       | 0.25462563 | 0.20128338 | 0.18966608 | 0.17208807 | 0.17360866 | 0.17920443 | 0.03839791 | 0.02921355 | 0.04636579 |
| 29                                       | 0.26186363 | 0.20718326 | 0.19556596 | 0.17786631 | 0.17932608 | 0.18486102 | 0.03912779 | 0.02957849 | 0.04764309 |
| 30                                       | 0.26928411 | 0.21356973 | 0.20164832 | 0.18370537 | 0.18516514 | 0.19057843 | 0.03943191 | 0.02976096 | 0.04812968 |
| 31                                       | 0.27627882 | 0.22038197 | 0.20821726 | 0.18936196 | 0.19088255 | 0.19587008 | 0.04022261 | 0.03024755 | 0.04928532 |
| 32                                       | 0.28260446 | 0.22646433 | 0.21423879 | 0.19483608 | 0.19653914 | 0.20104008 | 0.0407092  | 0.03055167 | 0.05013685 |
| 33                                       | 0.28874764 | 0.23254668 | 0.22007785 | 0.20037102 | 0.20243902 | 0.20602761 | 0.04131744 | 0.03097743 | 0.05117085 |
| 34                                       | 0.29501247 | 0.23808163 | 0.2256128  | 0.20596679 | 0.20785232 | 0.21101515 | 0.04168238 | 0.03115991 | 0.05214403 |
| 35                                       | 0.30018247 | 0.24416398 | 0.23151268 | 0.21144091 | 0.21308315 | 0.21600268 | 0.04265556 | 0.03195061 | 0.05336605 |
| 36                                       | 0.3054133  | 0.24982057 | 0.23674351 | 0.21661091 | 0.2181315  | 0.22062527 | 0.0430205  | 0.03219391 | 0.05402956 |
| 37                                       | 0.30973177 | 0.2550514  | 0.24209598 | 0.22165927 | 0.2233015  | 0.22494374 | 0.04362873 | 0.0324372  | 0.05494191 |
| 38                                       | 0.31392859 | 0.26040387 | 0.24726598 | 0.22682927 | 0.22822821 | 0.22859315 | 0.04435862 | 0.03310626 | 0.05615838 |
| 39                                       | 0.31648318 | 0.26502646 | 0.25188857 | 0.23133021 | 0.23291162 | 0.23236421 | 0.0448452  | 0.03328873 | 0.05694909 |
| 40                                       | 0.31873365 | 0.2697707  | 0.25638951 | 0.23558786 | 0.2372301  | 0.23558786 | 0.04514932 | 0.03353202 | 0.05743568 |
| 41                                       | 0.32134907 | 0.2736634  | 0.2602214  | 0.23996716 | 0.24191351 | 0.23856821 | 0.04581838 | 0.03389696 | 0.05865215 |
| 42                                       | 0.32226142 | 0.27743446 | 0.26380999 | 0.2444681  | 0.2455021  | 0.24100116 | 0.04648744 | 0.03444438 | 0.05974697 |
| 43                                       | 0.32359954 | 0.28053646 | 0.26709446 | 0.24836081 | 0.24945563 | 0.24367739 | 0.04697403 | 0.03493097 | 0.06053768 |
| 44                                       | 0.32451189 | 0.28315188 | 0.26922328 | 0.25219269 | 0.25346998 | 0.24483304 | 0.04685238 | 0.03462685 | 0.06041603 |
| 45                                       | 0.32445107 | 0.28588894 | 0.27226446 | 0.25541634 | 0.25657198 | 0.24659692 | 0.04733897 | 0.03468767 | 0.06138921 |
| 46                                       | 0.32499848 | 0.28789611 | 0.27408917 | 0.25870081 | 0.25967399 | 0.24726598 | 0.04764309 | 0.03499179 | 0.06205827 |
| 47                                       | 0.32390366 | 0.28953835 | 0.27591387 | 0.26137705 | 0.26198528 | 0.24836081 | 0.04800803 | 0.03523508 | 0.06278815 |
| 48                                       | 0.32372118 | 0.29075482 | 0.27706952 | 0.26380999 | 0.26478316 | 0.24884739 | 0.04849462 | 0.03560002 | 0.06376133 |
| 49                                       | 0.32256554 | 0.29166717 | 0.27761693 | 0.26606046 | 0.26672952 | 0.24927316 | 0.04861626 | 0.0355392  | 0.06400462 |
| 50                                       | 0.32177483 | 0.29209294 | 0.27792105 | 0.26776352 | 0.26806764 | 0.24890822 | 0.04916368 | 0.03584332 | 0.06479533 |
| 51                                       | 0.3198893  | 0.29203211 | 0.2780427  | 0.26922328 | 0.2697707  | 0.24878657 | 0.04958944 | 0.03620826 | 0.06552521 |
| 52                                       | 0.31903777 | 0.29166717 | 0.27786023 | 0.27031811 | 0.27092634 | 0.24823916 | 0.04995438 | 0.03651238 | 0.06613345 |
| 53                                       | 0.31703059 | 0.29154553 | 0.27749529 | 0.27104799 | 0.2718387  | 0.24708351 | 0.05013685 | 0.03645155 | 0.06668086 |
| 54                                       | 0.31593577 | 0.29087647 | 0.27664376 | 0.27129128 | 0.27171705 | 0.24623198 | 0.05050179 | 0.0365732  | 0.06734992 |
| 55                                       | 0.31398942 | 0.29020741 | 0.27609634 | 0.27189952 | 0.27196034 | 0.24538045 | 0.05104921 | 0.03705979 | 0.06832309 |
| 56                                       | 0.31192142 | 0.288626   | 0.27463658 | 0.2718387  | 0.2718387  | 0.24398151 | 0.05117085 | 0.03705979 | 0.06856639 |
| 57                                       | 0.31009671 | 0.28789611 | 0.27360258 | 0.27141293 | 0.27165623 | 0.24258257 | 0.05177909 | 0.03730308 | 0.06929627 |
| 58                                       | 0.30766377 | 0.28613223 | 0.27171705 | 0.27104799 | 0.27104799 | 0.24154857 | 0.05190074 | 0.03730308 | 0.06972204 |
| 59                                       | 0.30608236 | 0.28467247 | 0.27037893 | 0.2705614  | 0.27007481 | 0.23923727 | 0.05250897 | 0.03772885 | 0.07063439 |
| 60                                       | 0.30383188 | 0.28303023 | 0.26861505 | 0.2695274  | 0.26964905 | 0.23765586 | 0.05275227 | 0.03803297 | 0.0711818  |

Figure S1

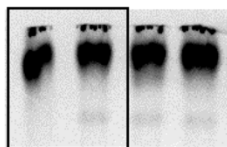

Figure S3 a

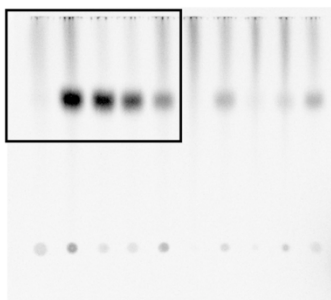

Figure S3 b

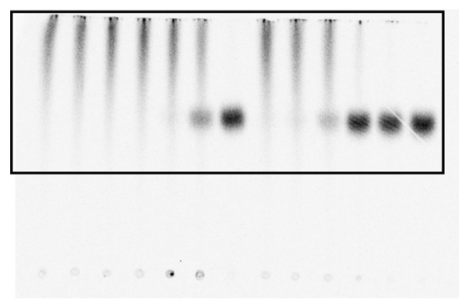

Figure S4 b

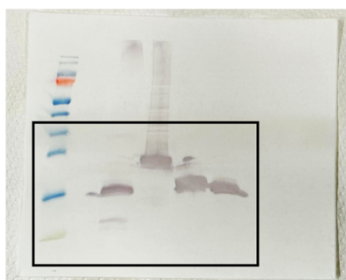

Figure S7 I

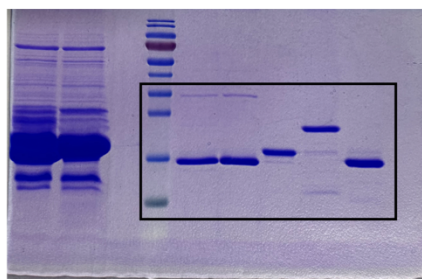

**Uncropped gels, western blots and autoradiography scans of supplementary figures.** Area used for preparing the figures is boxed. Source data for main figures is provided in a separate source data file.
